# Supplementary material for: miR-15a and miR-15b modulate natural killer and CD8+T-cell activation and anti-tumor immune response by targeting PD-L1 in neuroblastoma
Source: PubMed Central journal article supplement — Mol Ther Oncolytics. 2022 Mar 31;25:308–29. doi: 10.1016/j.omto.2022.03.010 (PMC9133764; doi:10.1016/j.omto.2022.03.010), 2022-03-31
Supplement: mmc1.pdf [file mmc1.pdf]

**Supplemental information**

**miR-15a and miR-15b modulate natural killer  
and CD8<sup>+</sup>T-cell activation and anti-tumor immune  
response by targeting PD-L1 in neuroblastoma**

**Anup S. Pathania, Philip Prathipati, Omalla A. Olwenyi, Srinivas Chava, Oghenetejiri V. Smith, Subash C. Gupta, Nagendra K. Chaturvedi, Siddappa N. Byrareddy, Don W. Coulter, and Kishore B. Challagundla**

# Supplementary Figure 1

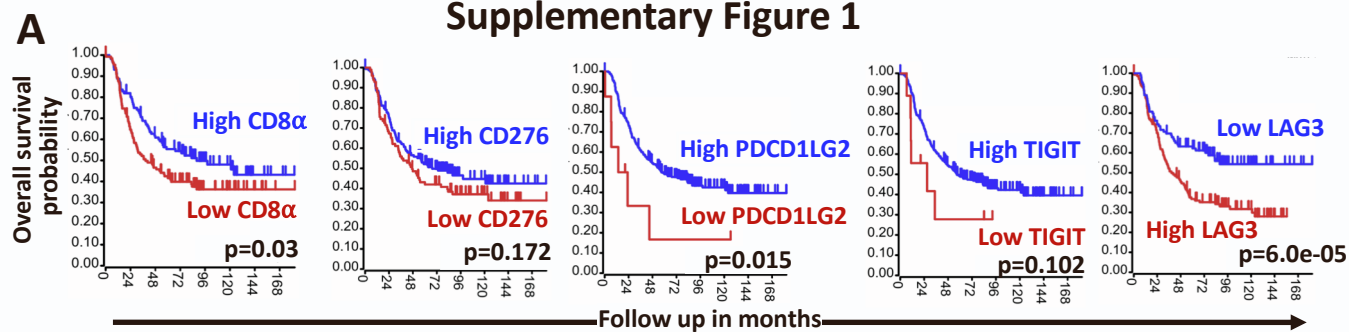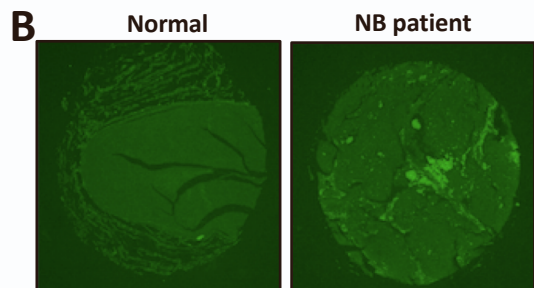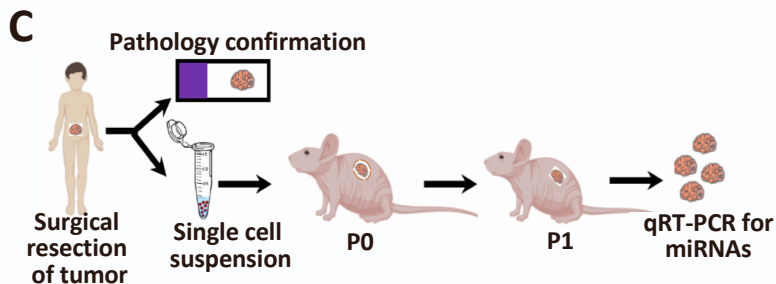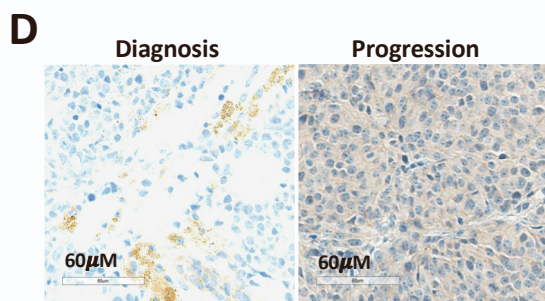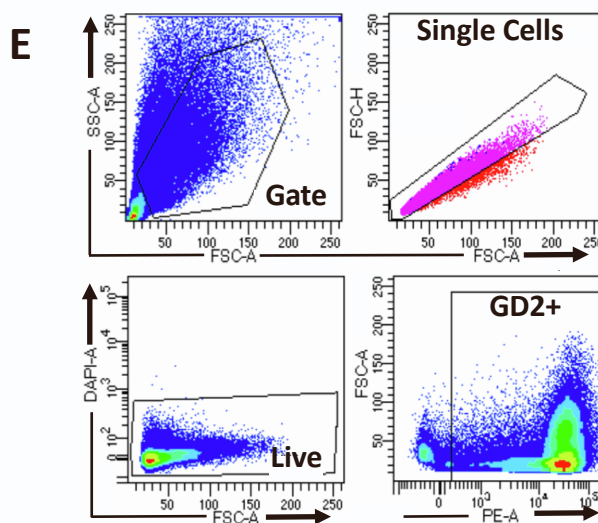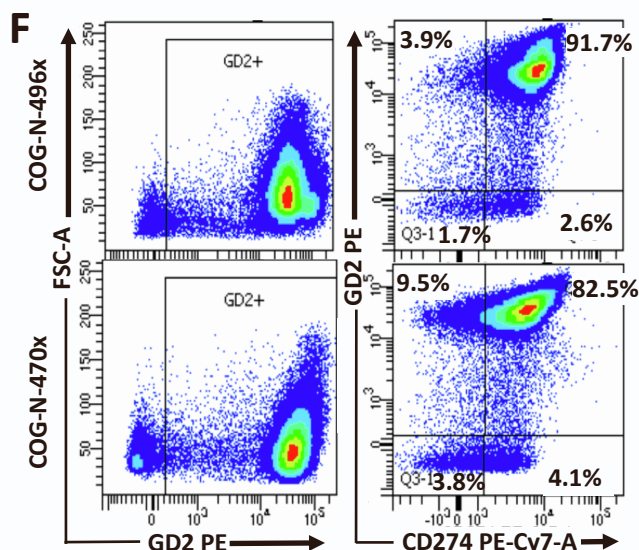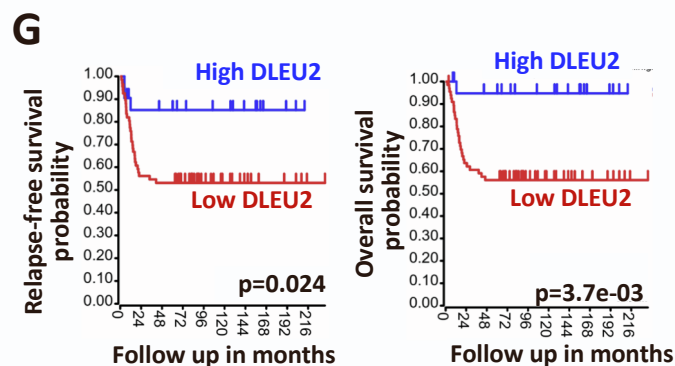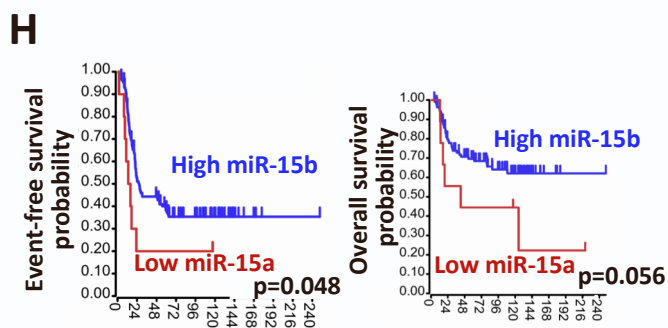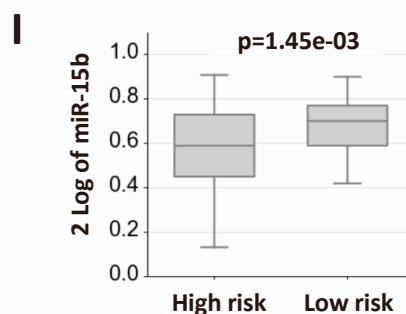

### Supplementary Figure 1.

(A) Kaplan-Meier curves showing event-free and overall survival probability rates with different levels of CD8 $\alpha$ , CD276, PDCD1LG2, TIGIT and LAG-3 in NB patients from the TARGET dataset. (B) Immunofluorescence images of PD-L1 on NB patient tumor and normal tissue microarrays photographed at 5X. (C) A schematic model displaying the procedure for establishing NB PDX tumor generation, implantation, and expansion in nude mice. The surgical procedure removed tumor tissues from patients, followed by single-cell preparation and subcutaneous injection into mice. Tumor tissues were harvested once the tumor reached end volume, then prepared a single-cell suspension, and ready for re-implantation in the next set of mice in multiple passages for expansion and was used for the experiments. P0 = Passage 0, P1 = Passage 1. (D) A representative IHC staining of total PD-L1 in NB PDX tumors of NB patients at the diagnosis and progression stages. (E) The gating strategy of GD2 enriched PDX-derived tumor cell population achieved through cell sorting by flow cytometry using PE-GD2 antibodies. (F) Representative flow cytometric plots showing the surface expression of PD-L1 on GD2<sup>+ve</sup> NB tumor cells isolated freshly from PDX tumor tissues. Percentage PD-L1<sup>+ve</sup> cells are shown in each quadrant. (G) Kaplan-Meier curves showing overall and relapse-free survival probability rates with different levels of the miR-15a host gene, *DLEU2* in the 88 NB patient samples in the Versteeg (GSE16476) dataset. (H) Kaplan-Meier curves showing overall and event-free survival probability rates with different levels of the miR-15b in NB patients (n=139) from the Tumor NB ALT-Westermann-144-tpm-gencode19 R2 dataset. (I) Box plots showing the expression of miR-15B in high-risk vs low-risk NB patient samples (n=96, GSE73515).

## Supplementary Figure 2

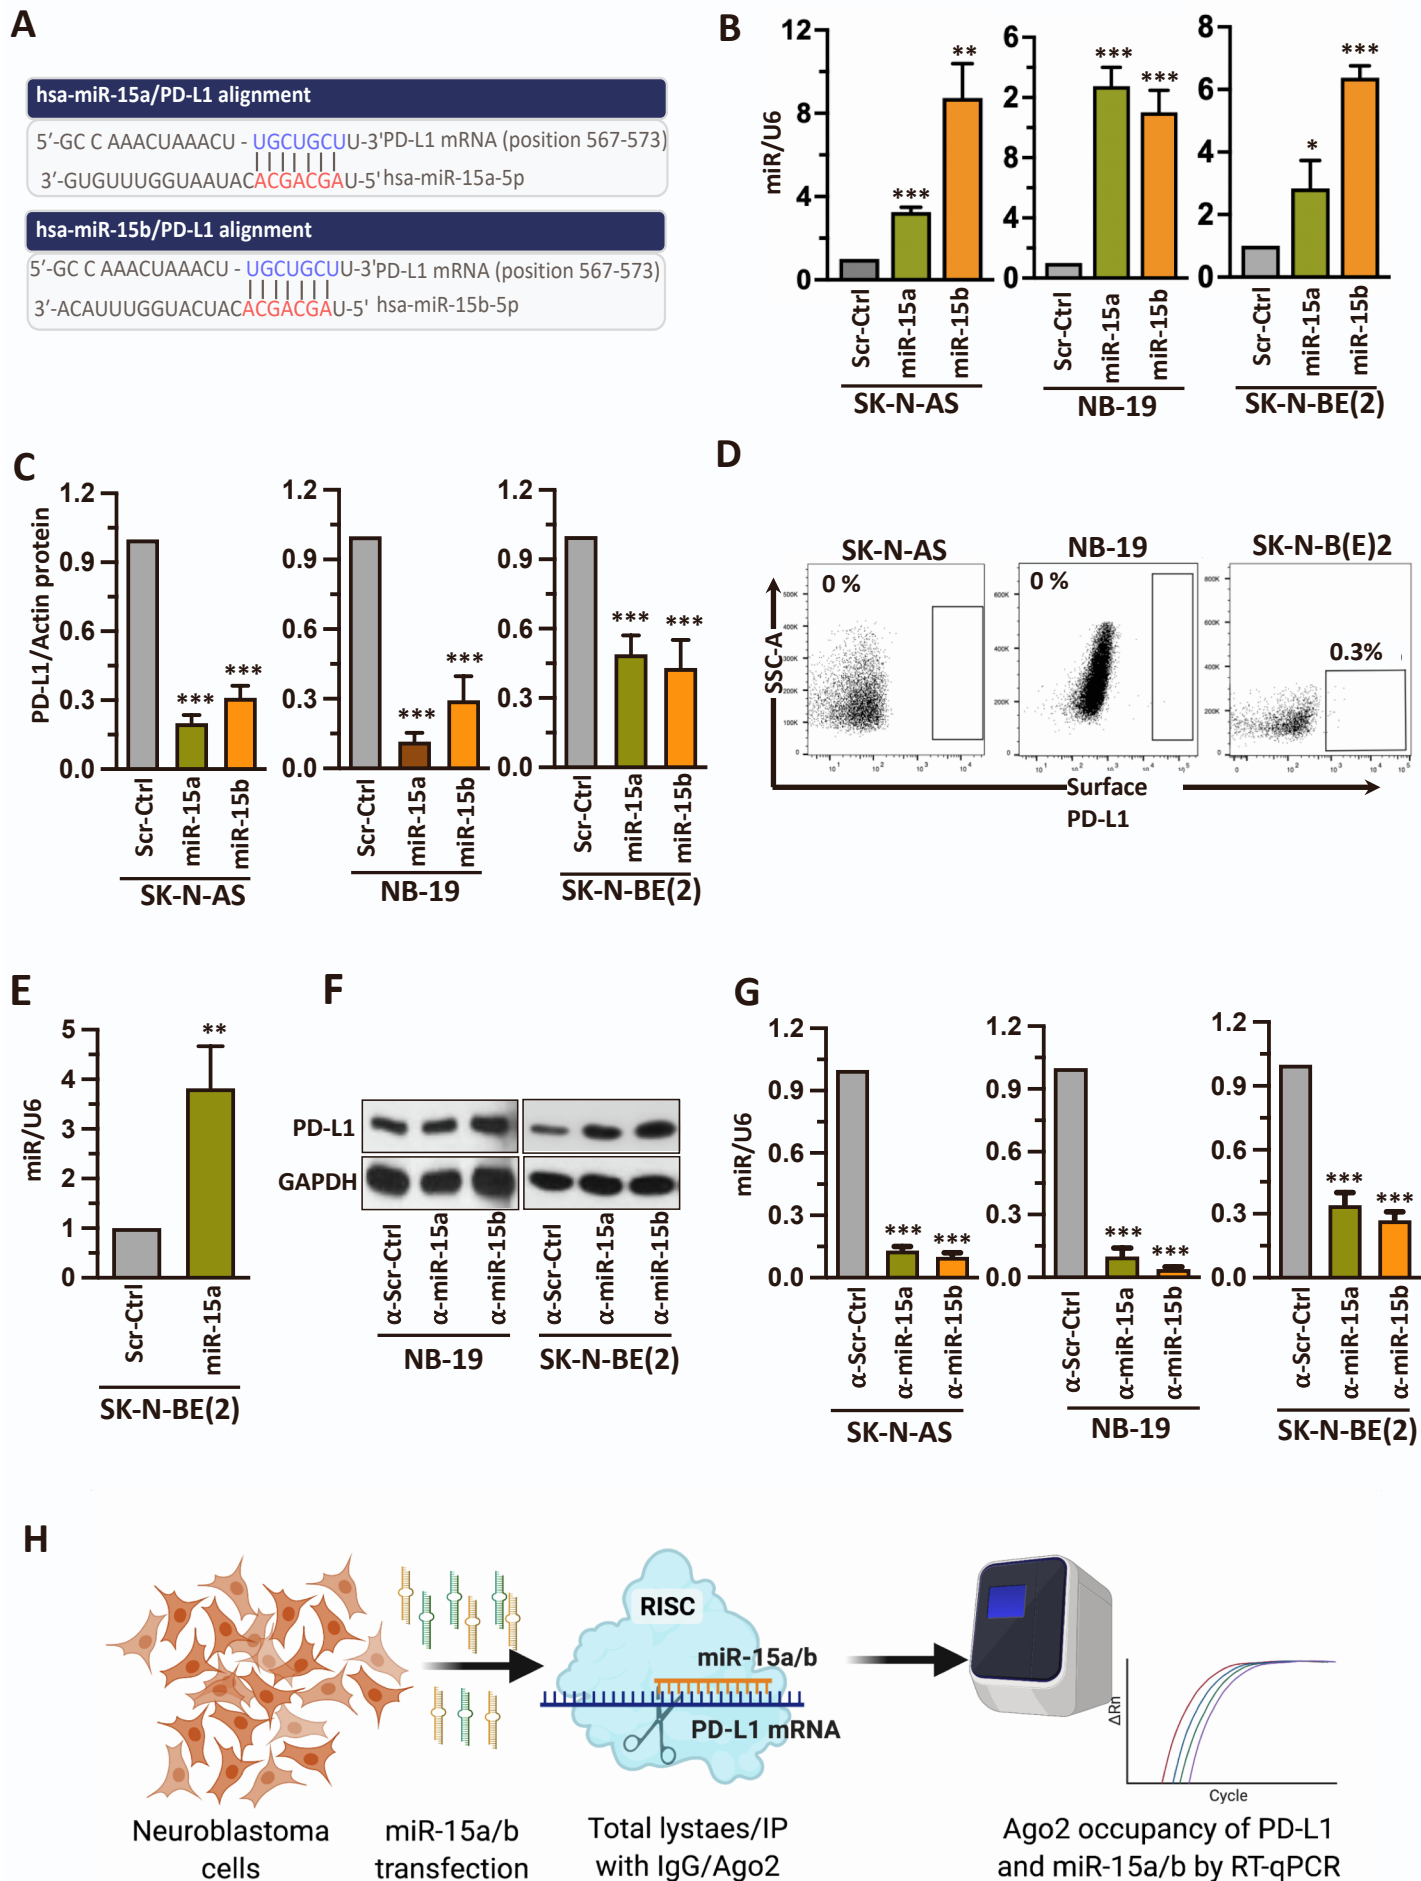



## Supplementary Figure 2.

(A) The sequence alignment shows the predicted binding sites between miR-15a, miR-15b, and 3'UTR of PD-L1 mRNA. Complementary sequences of PD-L1 mRNA and miRNAs are shown in blue and red, respectively. (B) Representative quantification graphs showing miR-15a and miR-15b levels normalized to U6 in NB cells transfected with miR-15a, miR-15b, or Scr Ctrl oligonucleotides for 48 h. (C) Representative quantification graphs showing total PD-L1 normalized to actin in NB cells transfected with miR-15a, miR-15b, or Scr Ctrl oligonucleotides for 48 h. (D) Representative flow cytometric plots showing a FMO control of cells stained with all fluorochromes except one used to set the background signal for PD-L1 in SK-N-AS (left panel), NB-19 (middle panel), and SK-N-B(E)2 (right panel) cells. A tube containing an unstained negative control or beads was used as compensation controls. (E) Representative quantification graph showing miR-15a levels normalized to U6 in SK-N-BE(2) cells stably expressing miR-15a for 48 h. (F) Western blotting for PD-L1 total protein in NB cells transfected with inhibitors of miRs such as  $\alpha$ -miR-15a,  $\alpha$ -miR-15b or  $\alpha$ - Scr Ctrl oligonucleotides for 48h. (G) Representative quantification graph showing miR-15a and miR-15b levels normalized to U6 in NB cells transfected with inhibitors of miRs such as  $\alpha$ -miR-15a,  $\alpha$ -miR-15b or  $\alpha$ - Scr Ctrl oligonucleotides for 48h. (H) A schematic representation of the Ago2 immunoprecipitation (IP) experiment to identify Ago2 occupied PD-L1 mRNA, miR-15a, and miR-15b in NB cells. Data represent mean  $\pm$  standard error of 3-4 independent biological experiments. Statistical analyses were performed using a two-sided unpaired *t*-test. \*\*\* $p < 0.001$ , \*\* $p < 0.01$ .

### Supplementary Figure 3

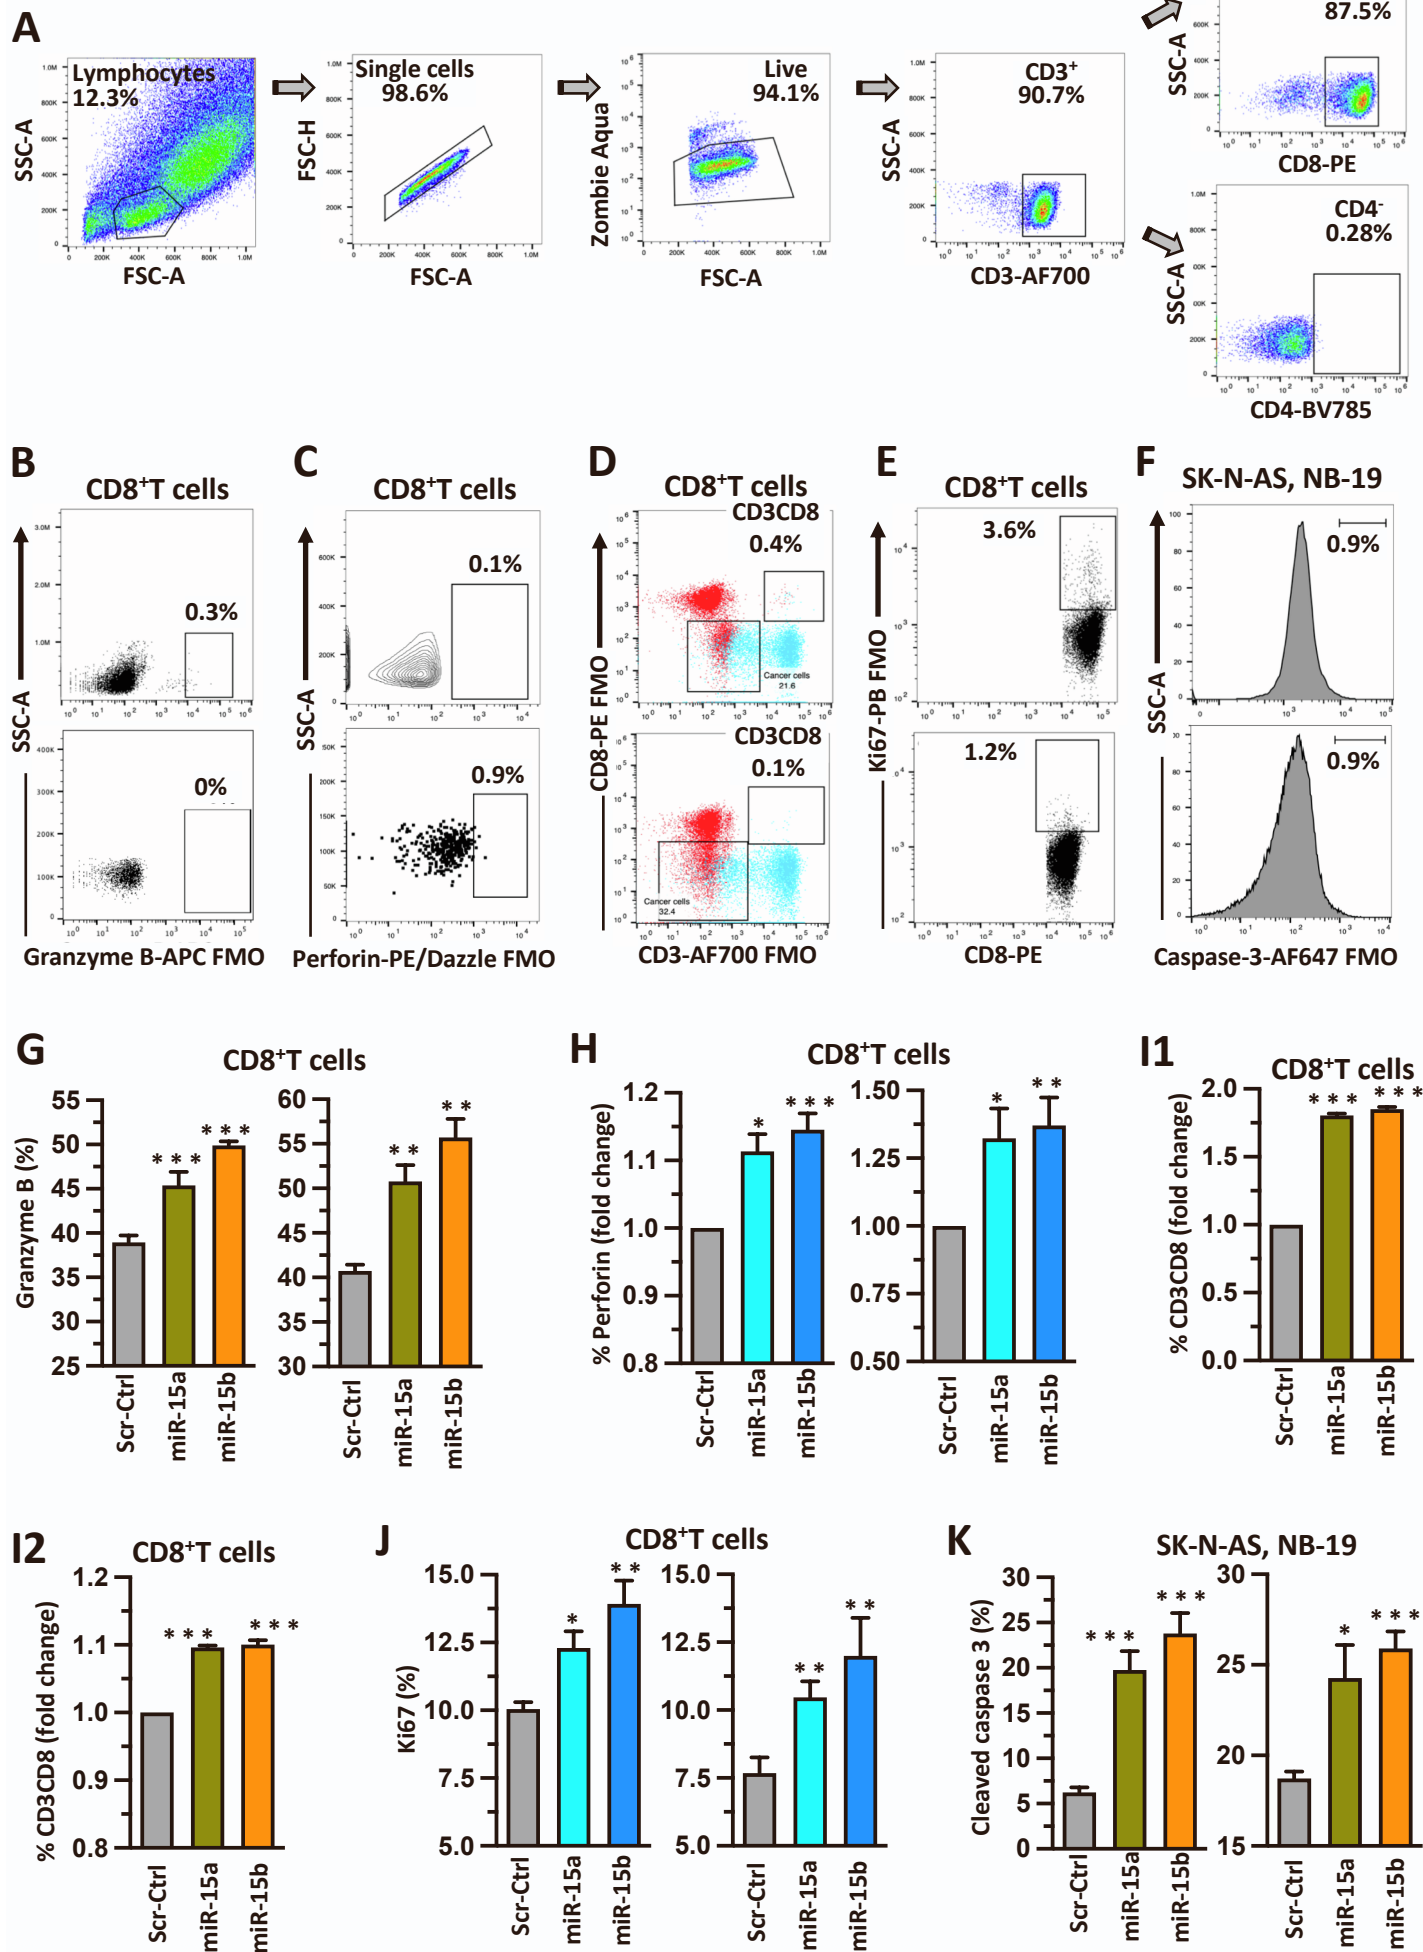

### Supplementary Figure 3.

(A) Representative flow cytometric pseudo color plots showing the gating strategy used to isolate human CD8<sup>+</sup>T cells. Untouched CD8<sup>+</sup>T cells were isolated from PBMCs of healthy human blood donors by negative selection using the MojoSort™ human CD8<sup>+</sup>T Cell Isolation Kit. The dead cells were identified and excluded from the final analysis by gating on the Zombie Aqua™ viability dye negative population, live cells. Cells were fluorescently stained with CD3-AF700, CD8-PE, CD4-BV785, and CD3<sup>+</sup>CD8<sup>+</sup>CD4<sup>-</sup> cells were used in the study. (B-F) Representative flow cytometric plots were showing a FMO control of cells stained with all fluorochromes except one used to set the background signal for Granzyme B<sup>+</sup> (B), Perforin<sup>+</sup> (C), CD3<sup>+</sup>/CD8<sup>+</sup> (D), Ki-67<sup>+</sup> (E) and cleaved caspase-3 (F) in experiments of Figure.3. A tube containing an unstained negative control or beads was used as compensation controls. (G-J) Bar graphs showing flow cytometric quantitative analysis of Granzyme B (G), Perforin (H), CD3/CD8 (I1,2), and Ki-67<sup>+</sup> (J) in CD8<sup>+</sup>T cells cocultured with miR-15a and miR-15b expressing SK-N-AS (G-J, left panels), and NB-19 (G-J, right panels) cells. (K) A representative flow cytometric quantitative analysis of intracellular active caspase-3 in miR-15a and miR-15b expressing SK-N-AS (left panel) and NB-19 (right panel) cells upon coculture with activated human CD8<sup>+</sup>T Cells (E:T ratio=1:1) for 48 h. Data represent mean ± standard error of 3-5 independent biological experiments. Statistical analyses were performed using a two-sided unpaired *t*-test. \**p*< 0.05, \*\**p*< 0.01, \*\*\**p*< 0.001.

# Supplementary Figure 4

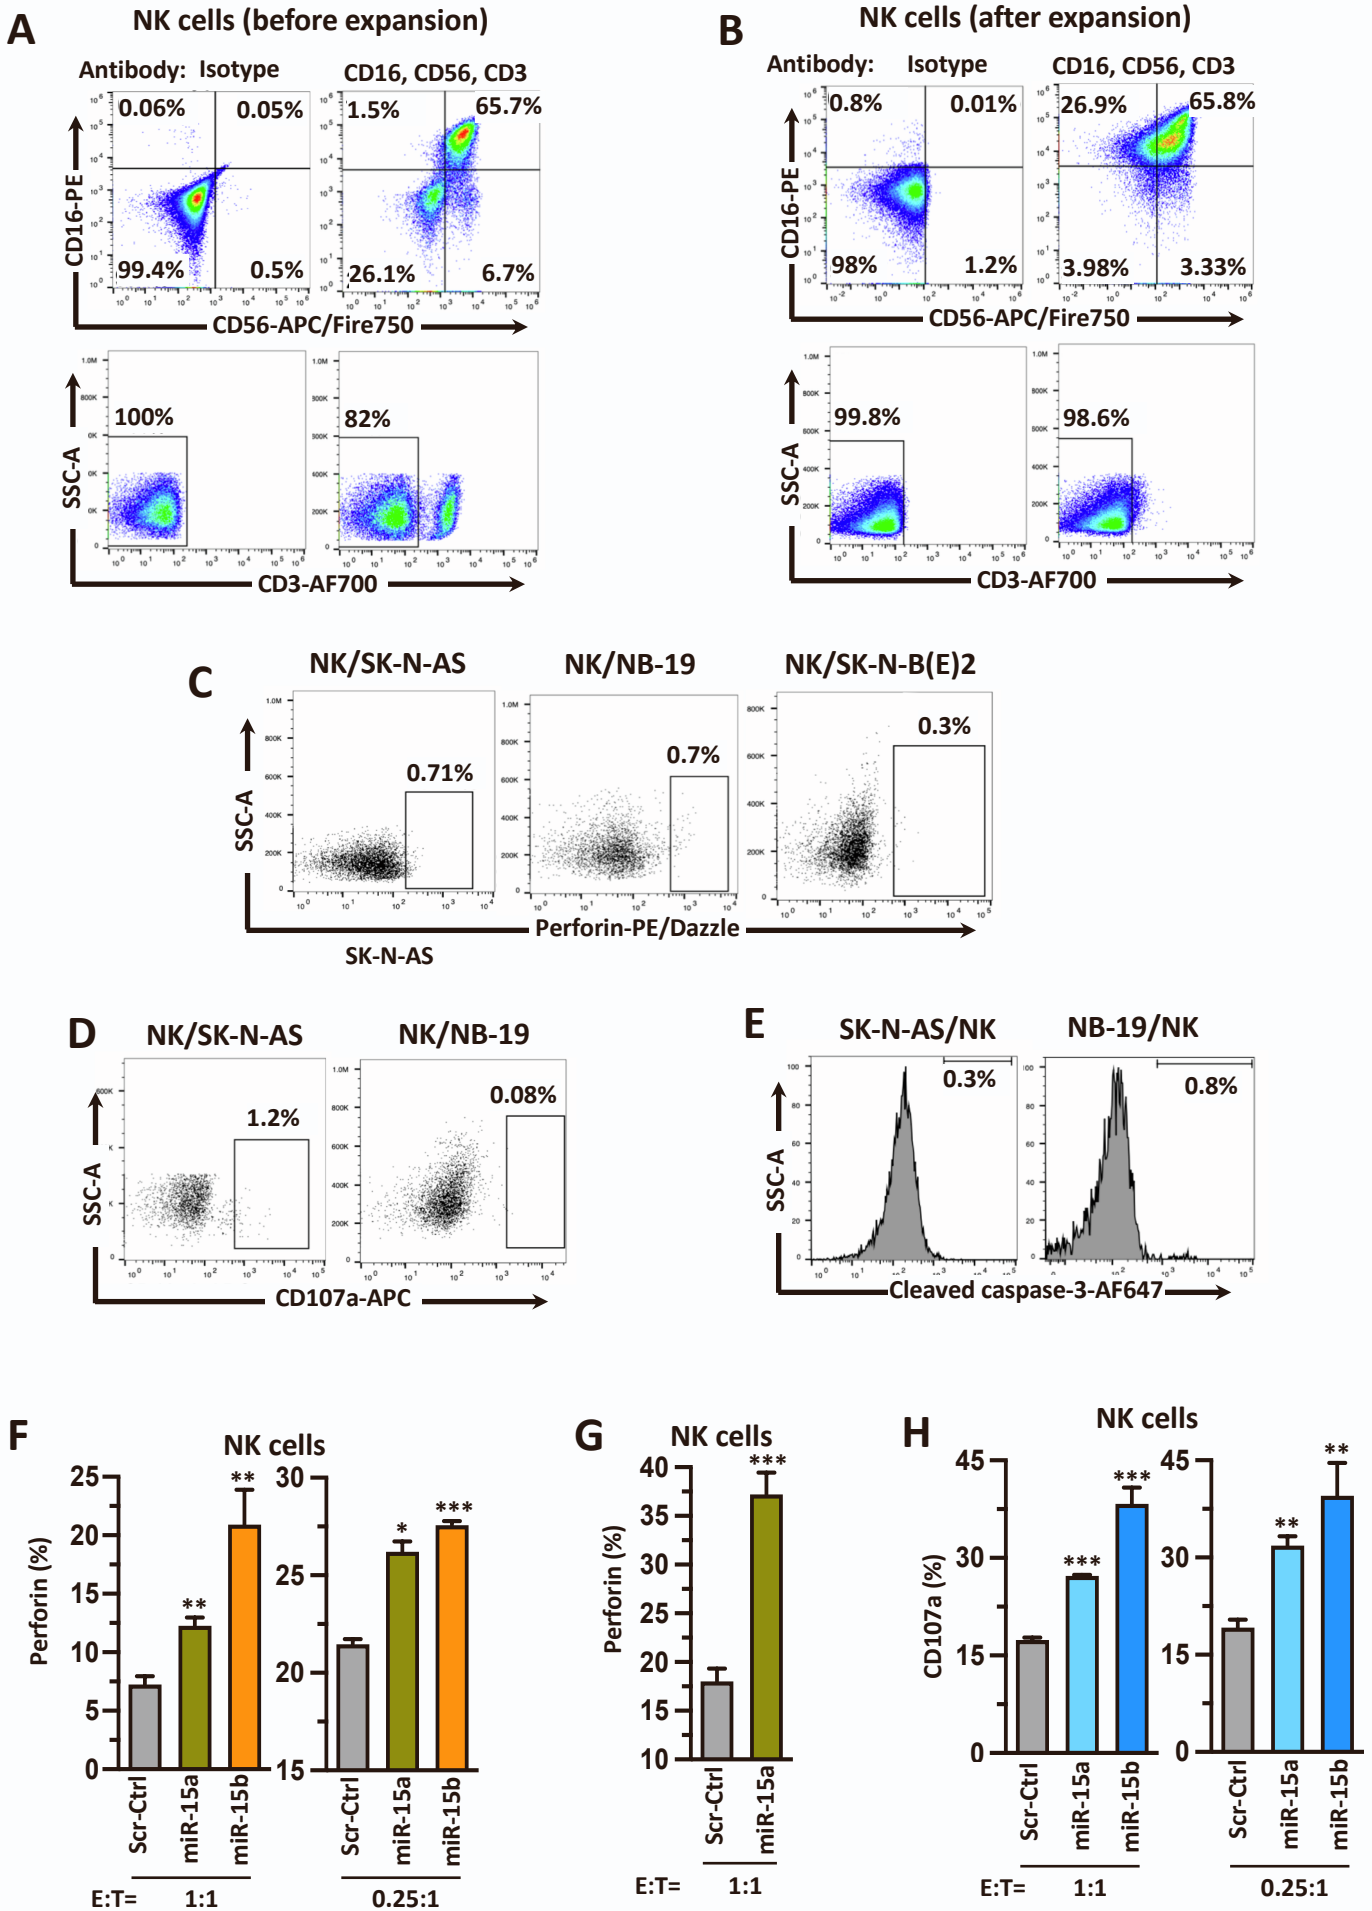

# Supplementary Figure 4 continued

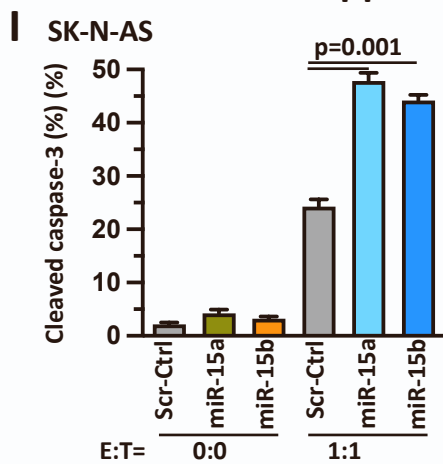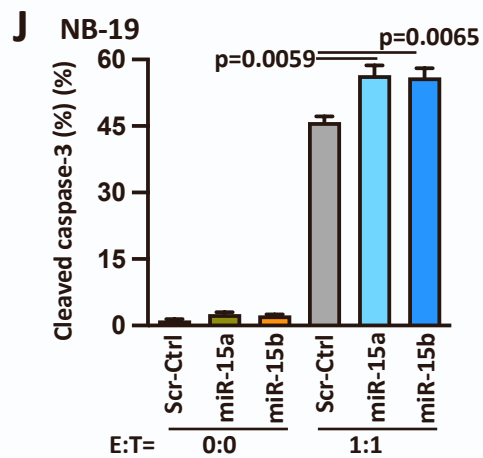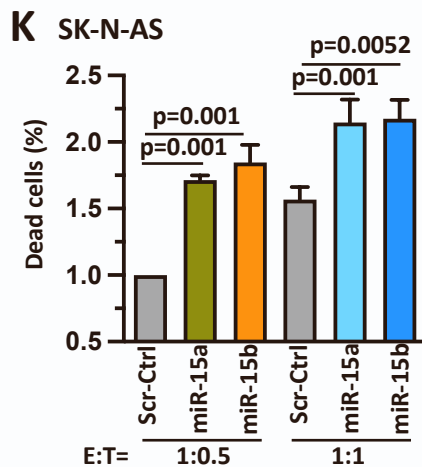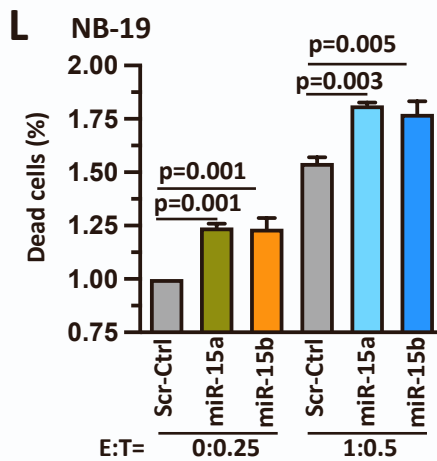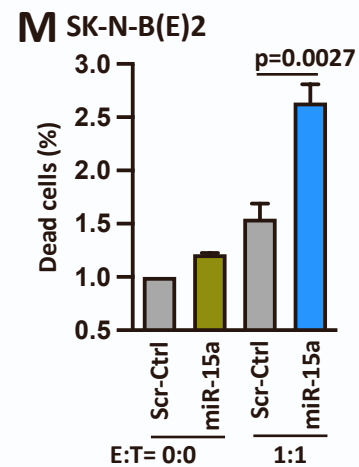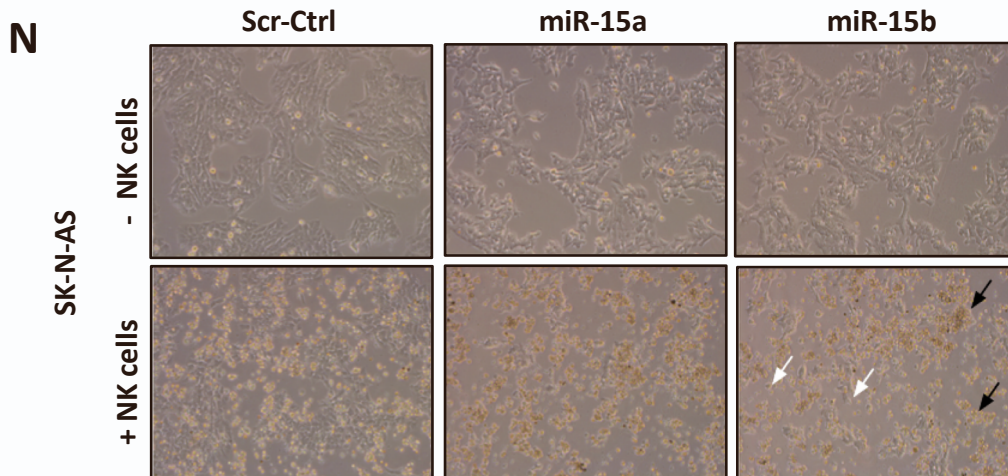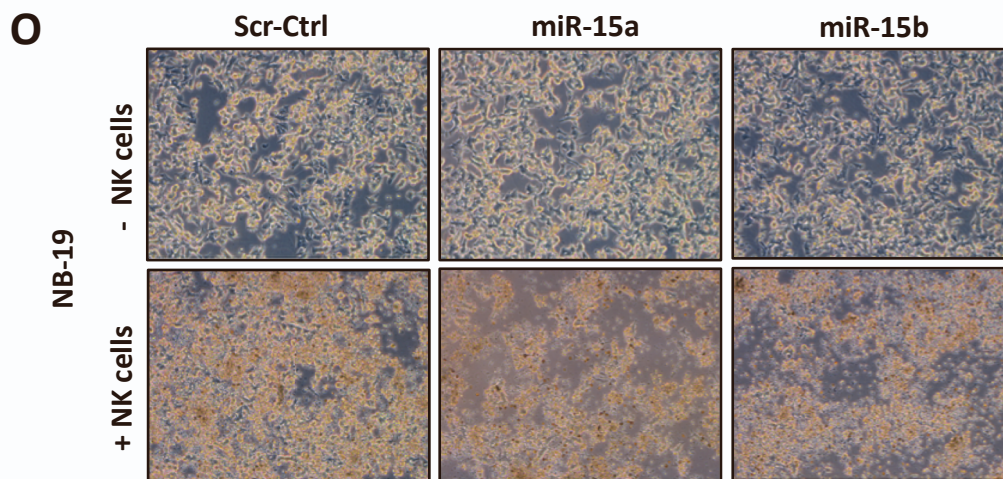

#### Supplementary Figure 4.

(A,B) Representative flow cytometric pseudocolor plots showing human NK cells purity before and after expansion *ex vivo* using irradiated K562-mbIL21 feeder cells and IL-2 for 14 days. NK cells were fluorescently stained with CD3-AF700, CD56-APC/Fire750, CD16-PE, and CD3<sup>-</sup>CD56<sup>+</sup>CD16<sup>+</sup> cells were used in the study. (C-E) Representative flow cytometric plots showing a FMO *control* of cells stained with all fluorochromes except one used to set the background signal for perforin (C), CD107a (D), and cleaved caspase-3 in experiments of Figure.4. A tube containing an unstained negative control or beads was used as compensation controls. (F-H) A representative flow cytometric quantitative analysis of perforin (F,G), CD107a (H) in NK cells after coculture with miR-15a or miR-15b expressing SK-N-AS (F,H left panels), stable miR-15a expressing SK-N-B(E)2 (G), and NB-19 (F,H right panels) cells 5 h. A representative flow cytometric quantitative analysis of intracellular cleaved caspase-3 (I,J), and dead cells (K-M) in miR-15a or miR-15b expressing SK-N-AS (I,K), NB-19 (J,L), and stable miR-15a expressing SK-N-B(E)2 (M) cells upon coculture (1:1 for SK-N-AS, 0.25:1 for NB-19 and 1:1 for SK-N-BE(2)) with activated human NK cells for 5h. (N,O) Phase-contrast microscope images of dead miR-15a and miR-15b expressing SK-N-AS (N), and NB-19 (O) cells upon coculture (E:T=1:1) with or without activated NK cells for 5h. The white arrow represents dying NB cells whereas the black arrow represents activated NK cells in action. Data represent mean  $\pm$  standard error of 3-5 independent biological experiments. Statistical analyses were performed using a two-sided unpaired *t*-test. \**p*< 0.05, \*\**p*< 0.01, \*\*\**p*< 0.001.



# Supplementary Figure 5

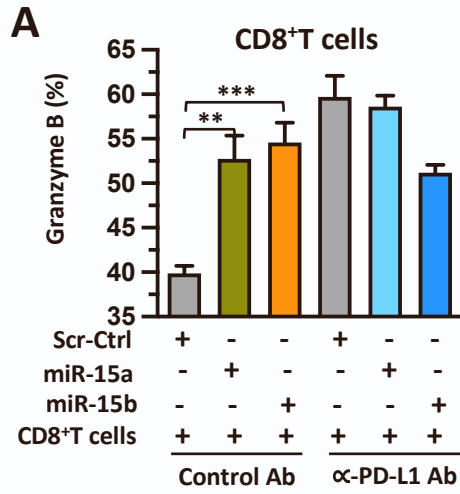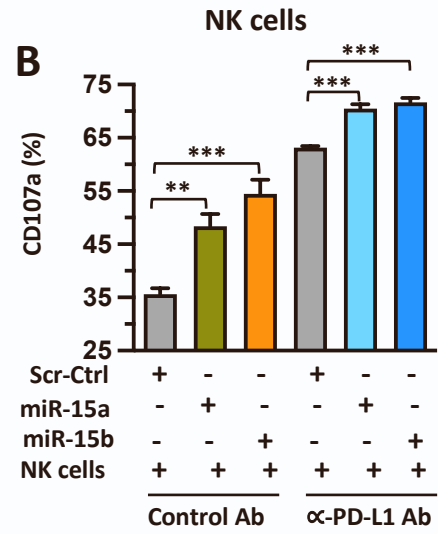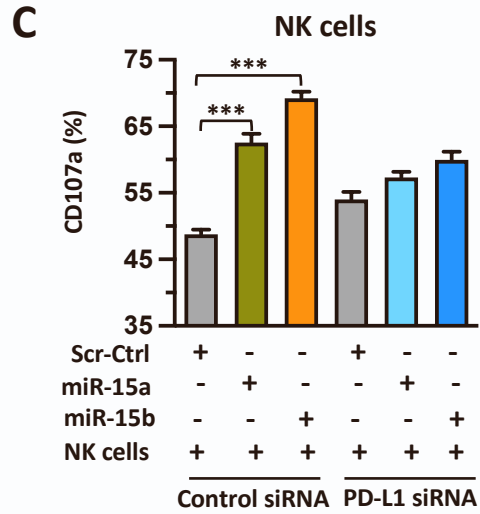

**Supplementary Figure 5.**

(A-C) Representative flow cytometric quantification graphs showing the expression of intracellular granzyme B (A) and surface CD107a (B,C) in CD8<sup>+</sup>T (A) and NK cells (B,C) cocultured with miR-15a or miR-15b expressing SK-N-AS (A) cells blocked by treatment with anti-PD-L1 antibody for 24h (A,B) or treatment with PD-L1 siRNA for 24h (C). Data represent mean  $\pm$  standard error of 3-5 independent biological experiments. Statistical analyses were performed using a two-sided unpaired *t*-test. \*\**p* < 0.01, \*\*\**p* < 0.001.

# Supplementary Figure 6

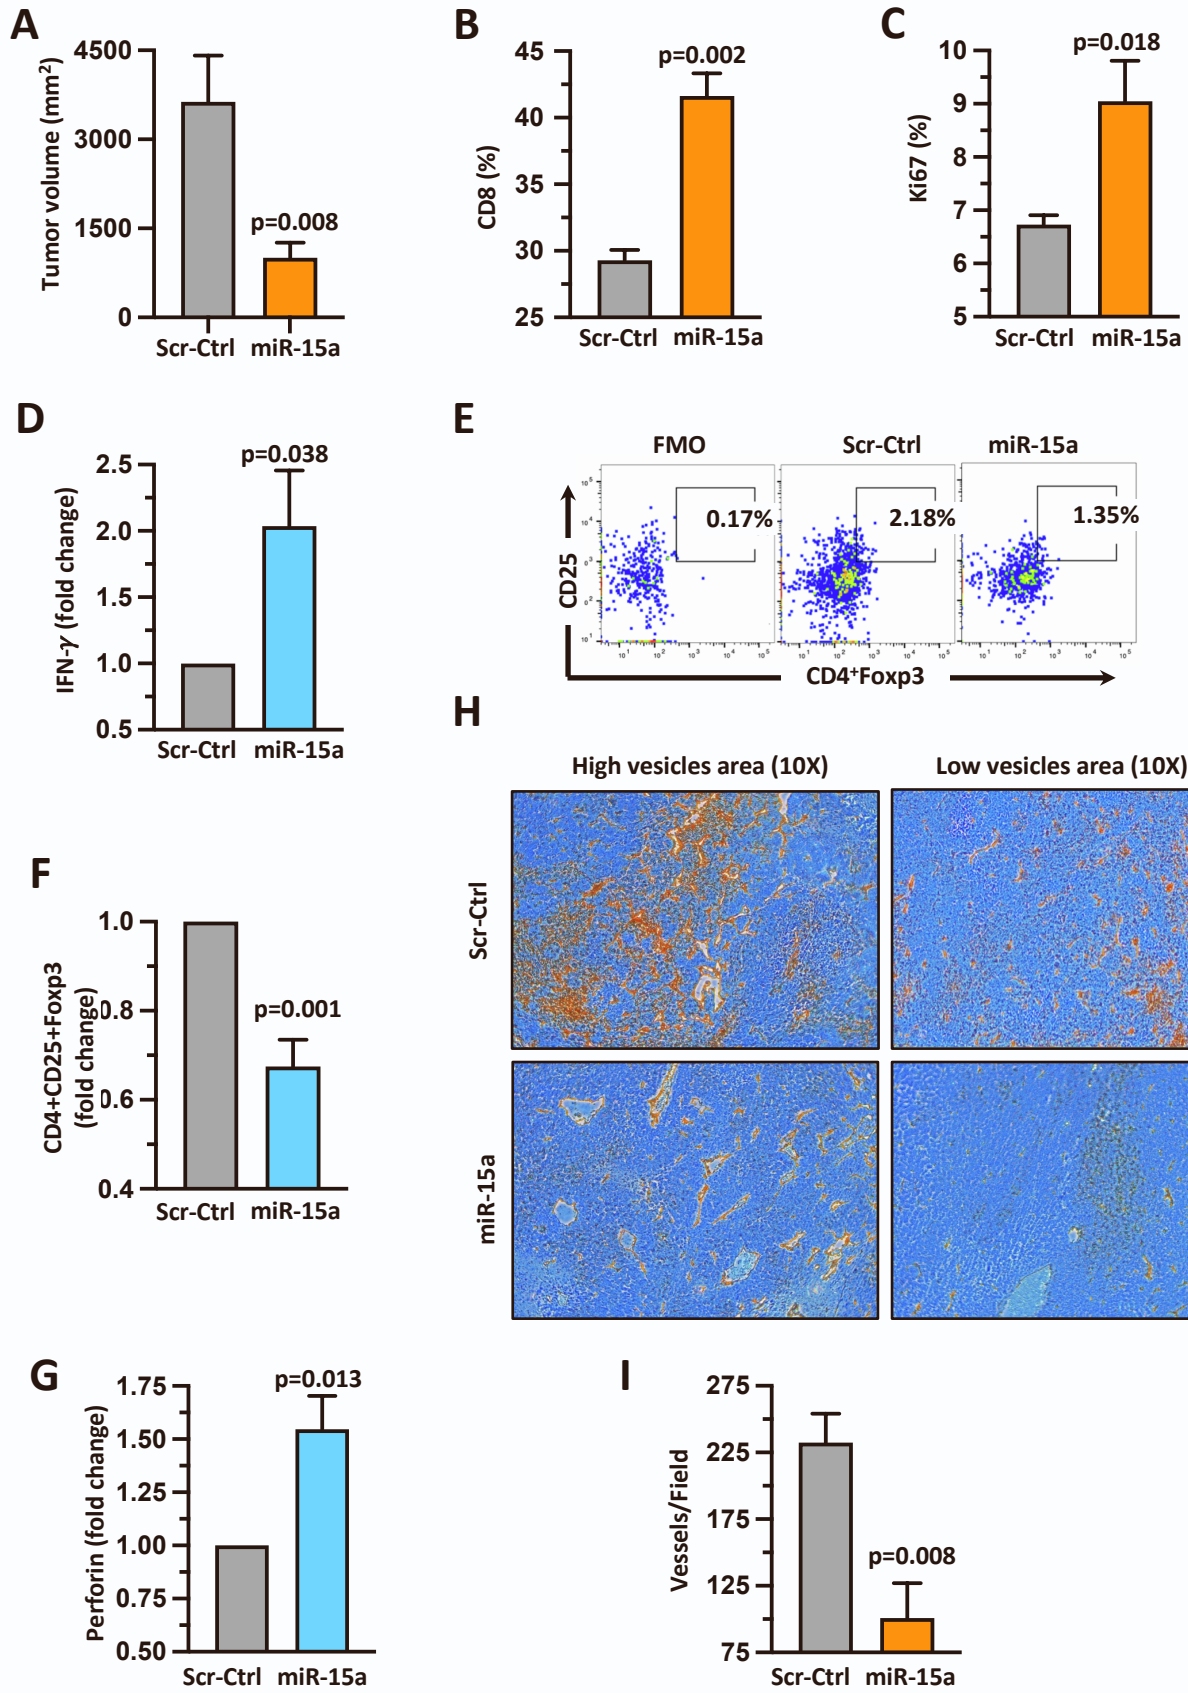

### **Supplementary Figure 6.**

(A) Summary graph showing tumor volume of the C57BL/6 mice that received subcutaneous murine NB-975 cells stably expressing miR-15a or Scr ctrl miRNAs. (B-G) Representative flow cytometric plots/quantitative analysis graphs showing the percentage of CD8 cells, Ki-67, IFN- $\gamma$  positive CD8<sup>+</sup>T cells, Tregs and their quantification, and perforin positive mouse NK cells analyzed from the single-cell suspension of tumor tissues from C57BL/6 mice that received subcutaneous murine NB-975 cells stably expressing miR-15a or Scr ctrl miRNAs for 30 days. Tumor tissues were harvested, prepared as single-cell suspensions, gated on CD4<sup>+</sup> (CD4<sup>+</sup>CD25<sup>+</sup>Foxp3<sup>+</sup>) population ( $\alpha$ -mouse BV785-CD4,  $\alpha$ -mouse PB-CD25,  $\alpha$ -mouse/rat/human AF647- Foxp3) and stained for Tregs by flow cytometry using their respective antibodies. Representative flow cytometric plot showing a FMO control of cells stained with all fluorochromes except one used to set the background signal for the analysis was given. Bar graphs are shown as mean  $\pm$  standard error (n=4 mice per group). (H,I) the representative IHC images of CD34 stained (murine endothelial cells) microvessels at 10X magnification and their quantification of mice tumors.
